# Supplementary material for: Tryptophan intercalation in siRNA drives the formation of polymeric micelles with enhanced delivery efficiency
Source: Royal Society of Chemistry journal article supplement (doi:10.1039/d4pm00142g), 2024-01-01
Supplement: d4pm00142g1.pdf [file d4pm00142g1.pdf]

Supplementary Information

**Tryptophan Intercalation in siRNA Drives the Formation of Polymeric Micelles  
with Enhanced Delivery Efficiency**

Yuki Nakashima<sup>a+</sup>, Wenqian Yang<sup>a+</sup>, Pengwen Chen<sup>a</sup>, Keita Masuda<sup>a</sup>, Teahun Hong<sup>b</sup>,  
Horacio Cabral<sup>a\*</sup>

a, Department of Bioengineering, Graduate School of Engineering, The University of  
Tokyo, Tokyo, Japan

b, Department of Molecular Pathology, Tokyo Medical University, Tokyo, Japan

+There authors contributed equally.

\*Corresponding author

[horacio@bmw.t.u-tokyo.ac.jp](mailto:horacio@bmw.t.u-tokyo.ac.jp)

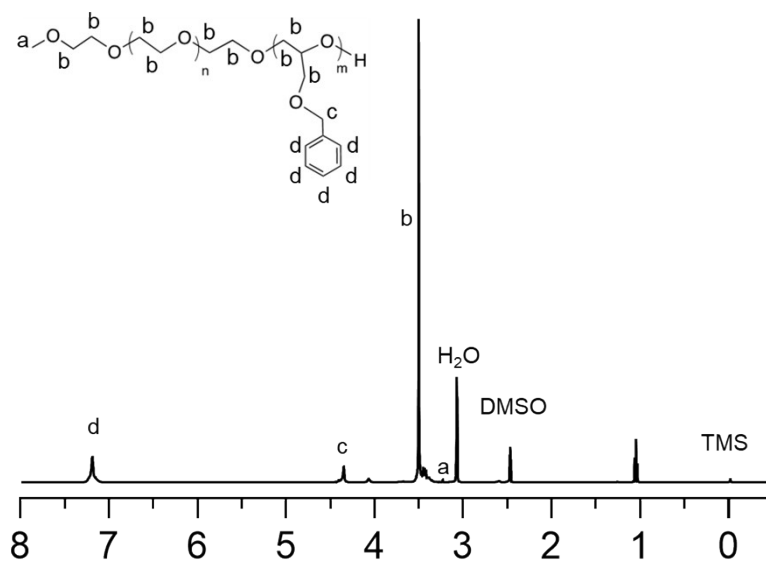

**Supplementary Fig. S1** <sup>1</sup>H-NMR of PEG-P(benzyl glycidyl ether) (polymer concentration: 10 mg/mL, solvent: DMSO, and temperature: 80°C)

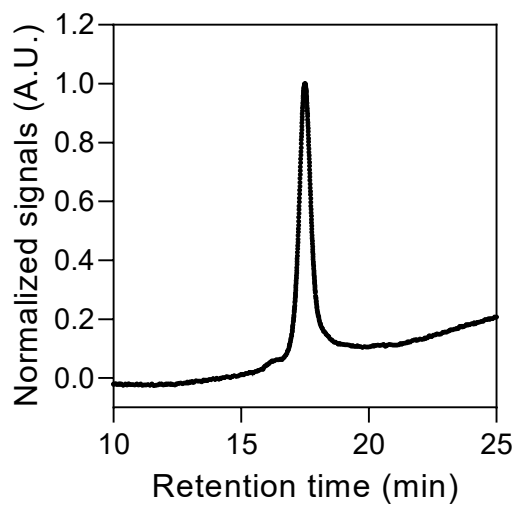

**Supplementary Fig. S2** GPC of PEG-P(benzyl glycidyl ether) (polymer concentration: 1 mg/mL, solvent: DMF)

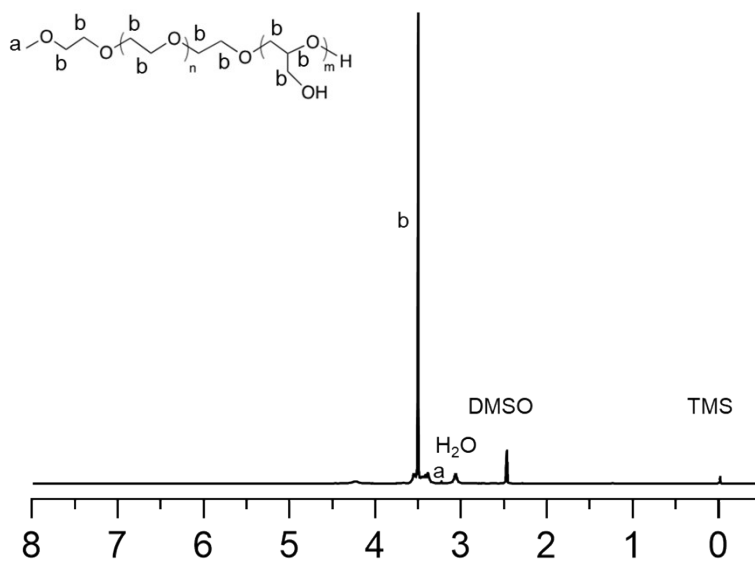

**Supplementary Fig. S3** <sup>1</sup>H-NMR of PEG-P(glycidol) (polymer concentration: 10 mg/mL, solvent: DMSO, and temperature: 80°C)

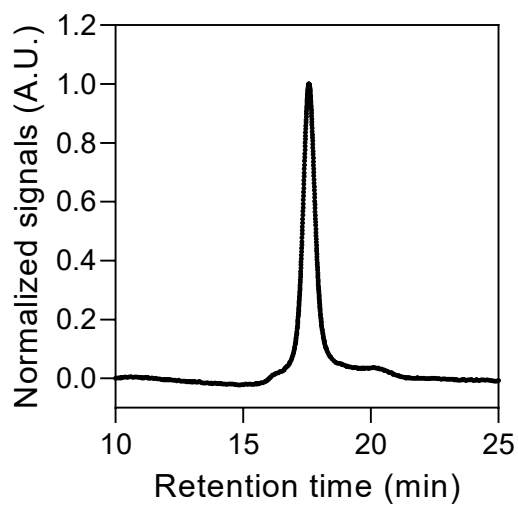

**Supplementary Fig. S4** GPC of PEG-P(glycidol) (polymer concentration: 1 mg/mL, solvent: DMF)

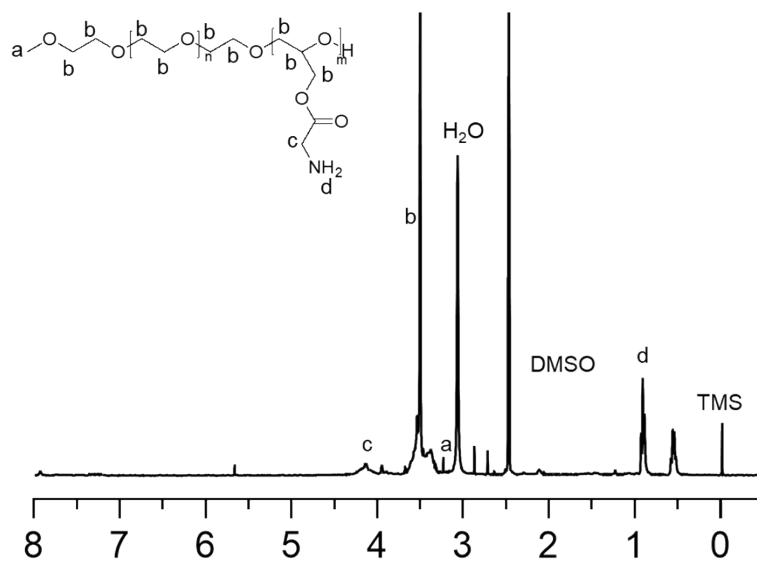

**Supplementary Fig. S5**  $^1\text{H-NMR}$  of PEG-PGGly (polymer concentration: 10 mg/mL, solvent: DMSO, and temperature: 80°C)

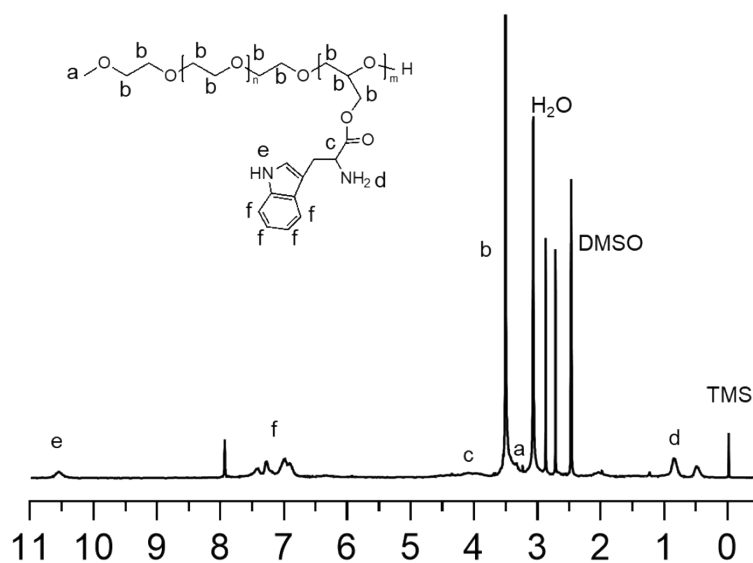

**Supplementary Fig. S6**  $^1\text{H-NMR}$  of PEG-PGTrp (polymer concentration: 10 mg/mL, solvent: DMSO, and temperature: 80°C)
